# Supplementary material for: Agalsidase alfa in pediatric patients with Fabry disease: a 6.5-year open-label follow-up study
Source: Springer Nature journal article supplement (doi:10.1186/s13023-014-0169-6), 2014-11-25
Supplement: MOESM1 [file 9775912]

Mean change from baseline HR by ECG (bpm)

Phase 1  
baseline

Start of  
phase 2

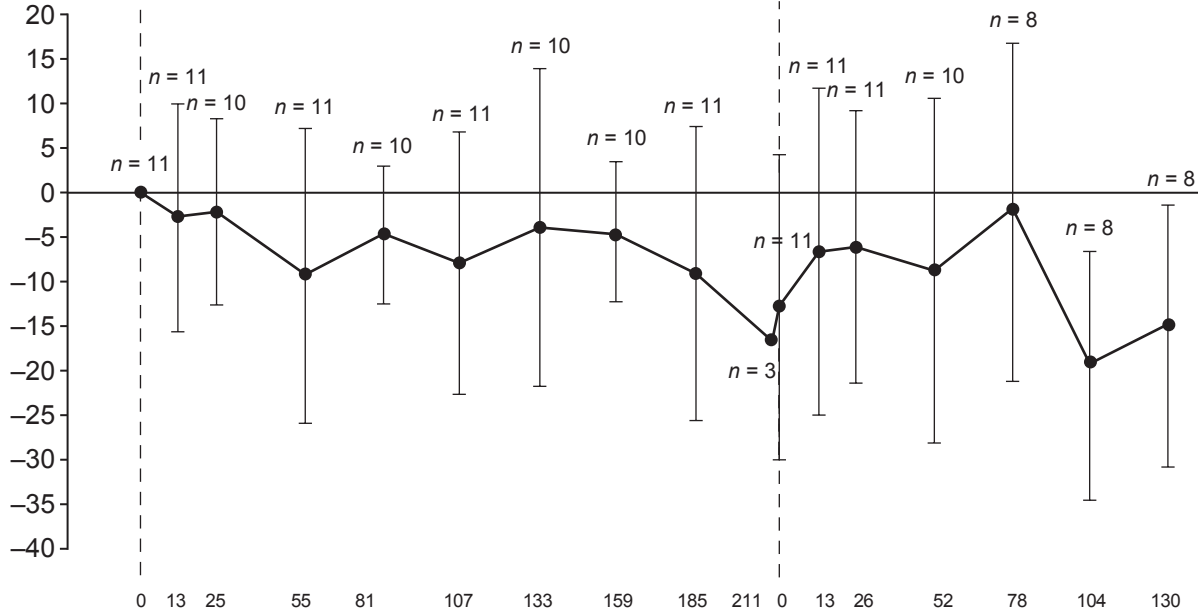

Weeks from first agal $\alpha$  infusion of each phase
